# Supplementary material for: The combined effects of temperature and aromatase inhibitor on metamorphosis, growth, locomotion, and sex ratio of tiger frog (Hoplobatrachus rugulosus) tadpoles
Source: PeerJ. 2020 Mar 20;8:e8834. doi: 10.7717/peerj.8834 (PMC7087491; doi:10.7717/peerj.8834)
Supplement: Supplemental Information 1 [file peerj-08-8834-s001.xls]

## Sheet: Supplementary Files1
Supplementary Files1 Raw data of metamorphosis time, body mass, snout-vent length and condition factor of froglets (GS46), jumping distance
Temperature (℃)	Letrozole concentration (mg/g)	Metamorphosis time (days)	Body mass (g)	Snout-vent length (mm)	Condition factor(g/mm)	Mean jumping distance (cm)	Jumping distance 1(cm)	Jumping distance 2(cm)	Jumping distance 3(cm)
29	1	23	1.2002	21.67	0.0117944	20.25	20.8	19.7	20.25
29	1	24	1.2099	20.43	0.0141888	18.48	19.34	17.8	18.3
29	1	24	1.2174	21.16	0.0128495	18	17	18.4	18.6
29	1	24	1.2204	20.92	0.0133296	18.08	18.52	17.6	18.12
29	1	24	1.2559	20.47	0.014642	17.95	16.92	18.3	18.63
29	1	26	1.3183	19.85	0.0168552	17.97	17.3	18.31	18.3
29	1	24	1.4115	21.61	0.0139867	17.38	16.84	17.53	17.77
29	1	24	1.4226	21.98	0.0133968	18.71	15.34	19.56	21.23
29	1	23	1.4253	23.5	0.0109825	21.01	17.45	23.03	22.55
29	1	26	1.4492	23.26	0.0115159	19.79	23.86	18.61	16.9
29	1	24	1.4685	23.49	0.0113299	18.77	22.53	17.69	16.09
29	1	23	1.4829	21.1	0.0157857	18.93	19.34	22.61	14.84
29	1	24	1.5279	22.53	0.0133602	18.51	16.32	20.46	18.75
29	1	23	1.5315	23.6	0.0116515	21.81	25.34	20.3	19.79
29	1	23	1.5385	22.14	0.0141764	21.64	22.35	18.34	24.23
29	1	24	1.5607	23.16	0.0125633	21.92	27.61	20.76	17.39
29	1	24	1.7275	21.68	0.0169528	19.98	14.56	21.58	23.8
29	1	23	1.8086	22.33	0.0162434	22.05	18.4	25.48	22.27
29	1	26	1.852	21.75	0.0179996	19.77	23.16	18.02	18.13
29	1	26	2.0193	24.07	0.0144801	21.05	23.5	24.12	15.53
29	1	26
29	1	26
29	1	26
29	1	26
29	1	26
29	1	26
29	1	26
29	1	26
29	1	26
29	1	26
29	1	26
29	1	26
29	1	27
29	1	27
29	1	27
29	1	27
29	1	27
29	1	27
29	1	27
29	1	28
29	1	28
29	1	28
29	1	28
29	1	28
29	1	28
29	1	28
29	1	29
29	1	29
29	1	31
29	1	31
29	1	31
29	2	26	0.9994	18.58	0.0155812	16.98	18.5	16.42	16.02
29	2	23	1.0513	19.59	0.0139837	16.24	16.82	17.63	14.27
29	2	23	1.2459	19.99	0.0155971	15.04	13.68	16.21	15.23
29	2	24	1.3206	20.99	0.0142802	15.96	14	15.38	18.5
29	2	23	1.4183	19.35	0.0195761	15.84	16.78	15.34	15.4
29	2	23	1.4429	22.24	0.0131169	19.99	18.3	19.2	22.47
29	2	23	1.4533	21.68	0.0142619	19.55	19.82	17.12	21.71
29	2	26	1.4615	20.17	0.0178107	21.5	18.11	23.14	23.25
29	2	26	1.5318	22.09	0.0142107	22.74	20.14	25.41	22.67
29	2	24	1.566	22.28	0.0141594	17.32	20.12	15.13	16.71
29	2	24	1.6135	23.67	0.0121667	18.41	18.2	20.05	16.98
29	2	23	1.624	23.31	0.0128221	18.21	17.32	17.1	20.21
29	2	24	1.6385	23.13	0.013241	19.81	23.11	20.1	16.22
29	2	26	1.6572	22.31	0.0149237	25.08	28.5	23.78	22.96
29	2	23	1.6781	22.39	0.0149505	18.24	18.5	16.12	20.1
29	2	23	1.7436	24.13	0.0124101	21.69	25.4	19.9	19.77
29	2	23	1.7633	23.82	0.0130467	19.35	20.8	18.56	18.69
29	2	23	1.8169	23.68	0.0136831	19.22	18.44	19.1	20.12
29	2	24	1.9102	24.25	0.013395	18.58	19.54	16	20.2
29	2	24	2.3351	24.99	0.0149626	21.85	20.4	20.15	25
29	2	26
29	2	26
29	2	26
29	2	26
29	2	26
29	2	26
29	2	26
29	2	26
29	2	26
29	2	26
29	2	26
29	2	26
29	2	26
29	2	26
29	2	26
29	2	26
29	2	26
29	2	26
29	2	26
29	2	26
29	2	26
29	2	27
29	2	27
29	2	27
29	2	27
29	2	28
29	2	28
29	2	28
29	2	28
29	2	28
29	2	28
29	2	28
29	2	28
29	2	28
29	2	29
29	2	29
29	2	29
29	2	30
29	2	35
29	2	35
29	2	35
29	3	23	1.0298	20.22	0.0124569	15.66	13.56	19.12	14.3
29	3	23	1.0953	20.34	0.0130161	16.9	15.78	15.62	19.3
29	3	23	1.1554	21.11	0.012282	16.78	18.67	16.8	14.87
29	3	23	1.1721	20.61	0.0133885	15.2	15.67	15.6	14.33
29	3	23	1.2526	20.49	0.0145608	20.81	20.71	21.7	20.02
29	3	23	1.2606	21.3	0.0130448	17.9	15.3	18.4	20
29	3	23	1.2657	21.05	0.0135698	14.11	19	12.5	10.83
29	3	23	1.2713	20.52	0.0147135	17.63	15.9	20.3	16.69
29	3	23	1.328	21.08	0.0141771	16.79	17.43	16.2	16.74
29	3	23	1.3625	21.64	0.0134451	18.8	20.5	20.6	15.3
29	3	24	1.3818	22.08	0.0128365	19.68	24.6	18.4	16.04
29	3	24	1.408	22.35	0.0126116	19.23	23.66	16.41	17.62
29	3	24	1.4103	21.83	0.0135566	17.94	16.67	20.14	17.01
29	3	24	1.4524	22.13	0.0134011	17.29	15.71	15.14	21.02
29	3	24	1.8067	24.28	0.0126223	20.24	18.2	24.56	17.96
29	3	24	1.886	22.59	0.0163604	17.01	19.01	17.43	14.59
29	3	24	1.952	24.06	0.014015	23.98	25.3	21.15	25.49
29	3	24	1.9707	23.72	0.0147665	17.08	15.15	16.89	19.2
29	3	24	2.2034	22.9	0.0183479	18.87	16.3	20.5	19.81
29	3	24	2.3404	24.81	0.0153253	20.05	21.56	24.13	14.46
29	3	26
29	3	26
29	3	26
29	3	26
29	3	26
29	3	26
29	3	26
29	3	26
29	3	26
29	3	26
29	3	26
29	3	26
29	3	26
29	3	26
29	3	26
29	3	26
29	3	26
29	3	26
29	3	26
29	3	26
29	3	26
29	3	26
29	3	26
29	3	26
29	3	26
29	3	27
29	3	27
29	3	27
29	3	27
29	3	27
29	3	28
29	3	28
29	3	28
29	3	28
29	3	28
29	3	28
29	3	28
29	3	29
29	3	29
29	3	29
29	3	29
29	3	29
29	3	29
29	3	30
29	3	30
29	3	30
34	1	19	1.1135	21.91	0.0105868	16.47	18.54	15.3	15.57
34	1	19	1.1548	20.13	0.0141571	17.81	19.1	20.13	14.2
34	1	18	1.2026	20.06	0.014898	17.68	16.8	16.68	19.56
34	1	19	1.2199	21.66	0.0120046	16.98	16.1	18.34	16.5
34	1	19	1.2301	20.39	0.0145107	18.19	19.2	15.27	20.1
34	1	19	1.259	19.75	0.0163427	17.28	18.2	19.11	14.53
34	1	17	1.2748	21.31	0.0131732	17.64	17.56	20.54	14.82
34	1	20	1.2896	22.06	0.0120126	17.78	20.92	16.12	16.3
34	1	18	1.3097	21.32	0.0135148	20.17	15.26	19.9	25.35
34	1	19	1.3171	21.93	0.0124883	20.38	22.56	19.78	18.8
34	1	18	1.3527	23.17	0.0108749	20.28	16.6	24.56	19.68
34	1	20	1.3748	22.35	0.0123142	19.06	20.5	16.32	20.36
34	1	19	1.4103	21.59	0.0140137	18.06	19.18	20.89	14.11
34	1	19	1.4251	21.65	0.0140434	18.69	15.2	20.7	20.17
34	1	20	1.4825	19.64	0.0195691	16.26	14.72	18.63	15.43
34	1	19	1.49	20.59	0.0170694	17.43	19.05	17.3	15.94
34	1	20	1.5223	20.73	0.0170884	20.78	16.41	26.95	18.98
34	1	20	1.5574	21.13	0.0165083	20.58	16.33	20	25.41
34	1	20	1.5587	22.19	0.0142656	19.91	19.4	20.43	19.9
34	1	19	1.6916	20.67	0.0191547	20.24	22.78	17.2	20.74
34	1	20
34	1	20
34	1	20
34	1	20
34	1	20
34	1	21
34	1	21
34	1	21
34	1	21
34	1	21
34	1	21
34	1	21
34	1	21
34	1	21
34	1	21
34	1	21
34	1	22
34	1	22
34	1	22
34	1	22
34	1	22
34	1	22
34	1	22
34	1	25
34	1	25
34	1	25
34	1	25
34	1	25
34	1	25
34	1	25
34	2	21	1.0916	19.89	0.0138726	18.94	16.54	18.9	21.38
34	2	19	1.1042	21.63	0.0109113	17.34	15.32	16.7	20
34	2	21	1.1441	19.07	0.0164973	20.96	24.51	16.21	22.16
34	2	21	1.1452	20.62	0.0130622	16.48	15.2	19.31	14.93
34	2	18	1.2186	19.63	0.0161102	17.83	16.97	16.42	20.1
34	2	20	1.2225	21.07	0.0130694	17.7	17.4	15.72	19.98
34	2	19	1.2334	23	0.0101373	19.67	19.01	20.58	19.42
34	2	21	1.2799	19.44	0.0174216	18.46	16.4	16.85	22.13
34	2	21	1.2973	19.92	0.0164124	18.9	18.3	17.81	20.59
34	2	19	1.3081	22.34	0.0117325	20.77	22.6	20	19.71
34	2	18	1.313	22.23	0.0119522	18.76	21.45	15.2	19.63
34	2	17	1.3335	24.67	0.00888148	19.88	19.3	20.54	19.8
34	2	18	1.3562	21.5	0.0136461	19.27	19.21	17.9	20.7
34	2	20	1.3782	21.69	0.0135062	20.65	21.65	19.2	21.1
34	2	20	1.3874	20.8	0.0154174	18.9	18.5	18.2	20
34	2	21	1.4022	24.44	0.0096052	24.42	20.37	28.23	24.66
34	2	20	1.4901	21.84	0.014304	18.24	19.45	20.6	14.67
34	2	20	1.5156	21.43	0.0153999	18.02	20.45	15.78	17.83
34	2	21	1.5355	22.23	0.0139776	17.65	17.33	16.45	19.17
34	2	21	1.6727	21.9	0.0159252	23.72	23.01	28.15	20
34	2	21
34	2	21
34	2	21
34	2	21
34	2	21
34	2	21
34	2	21
34	2	21
34	2	21
34	2	21
34	2	21
34	2	21
34	2	21
34	2	21
34	2	21
34	2	21
34	2	21
34	2	21
34	2	21
34	2	21
34	2	21
34	2	22
34	2	22
34	2	22
34	2	22
34	2	22
34	2	22
34	2	22
34	2	22
34	2	22
34	2	22
34	2	22
34	2	25
34	2	28
34	3	20	1.1147	21.19	0.0117156	14.91	10.56	16.05	18.12
34	3	21	1.1641	22.43	0.0103158	20.22	16.91	24.31	19.44
34	3	20	1.2708	20.19	0.0154407	19.36	19.34	18.54	20.2
34	3	18	1.2714	20.66	0.0144175	19.12	14.7	22.56	20.1
34	3	18	1.2769	22.28	0.0115455	19.48	16.32	20.01	22.11
34	3	20	1.2982	21.99	0.0122086	17.77	18.54	20.6	14.17
34	3	20	1.3027	19.49	0.0175958	19.32	20.56	20.1	17.3
34	3	19	1.327	21.95	0.0125478	18.79	16.42	25.13	14.82
34	3	20	1.3321	18.58	0.0207682	19.56	15.94	18.85	23.89
34	3	20	1.3338	19.05	0.0192933	18.63	20	19.45	16.44
34	3	18	1.3363	20.88	0.0146795	17.03	19.89	15.9	15.3
34	3	19	1.3404	21.54	0.0134121	18.17	16.3	23.65	14.56
34	3	20	1.4208	20.57	0.0163241	16.35	14.57	16.83	17.65
34	3	17	1.4691	23.01	0.0120587	21.71	19.2	25.41	20.52
34	3	20	1.5039	18.58	0.0234467	18.07	14.8	18.77	20.64
34	3	21	1.5435	23.07	0.0125708	21.9	19.56	26.13	20.01
34	3	21	1.5718	22.91	0.0130714	18.81	16.65	20.2	19.58
34	3	17	1.5925	21.98	0.0149967	19.82	21.5	17.58	20.38
34	3	19	1.6419	22.33	0.0147462	18.46	17.7	19.56	18.12
34	3	21	1.7178	22.42	0.0152428	20.5	26.89	16.3	18.31
34	3	21
34	3	21
34	3	21
34	3	21
34	3	21
34	3	21
34	3	21
34	3	21
34	3	22
34	3	22
34	3	22
34	3	22
34	3	22
34	3	22
34	3	22
34	3	22
34	3	22
34	3	22
34	3	22
34	3	22
34	3	22
34	3	22
34	3	22
34	3	25
34	3	25
34	3	25
34	3	25
34	3	25
34	3	25
34	3	28
