# Supplementary material for: The combined effects of temperature and aromatase inhibitor on metamorphosis, growth, locomotion, and sex ratio of tiger frog (Hoplobatrachus rugulosus) tadpoles
Source: PeerJ. 2020 Mar 20;8:e8834. doi: 10.7717/peerj.8834 (PMC7087491; doi:10.7717/peerj.8834)
Supplement: Supplemental Information 2 [file peerj-08-8834-s002.xls]

## Sheet: Supplementary Files2
Supplementary Files2 Raw data of metamorphosis, number of survival individuals, number of males and females
Temperature (℃)	Letrozole concentration (mg/g)	N(GS46)	Metamorphosis rate（%）		number of survivial individuals at 90-day	number of males	number of females	number of dissected dead frogs	number of males in dissected dead frogs	number of females in dissected dead frogs	number of dead frogs	number of males in dead frogs (estimated value )	number of females in dead frogs (estimated value )	male ratio	female ratio
29	0	51	56.6667		27	14	13	10	6	4	24	14	10	0.54902	0.45098
29	0.1	61	67.7778		30	25	5	6	5	1	31	26	5	0.836066	0.163934
29	1	66	73.3333		37	32	5	5	5	0	29	29	0	0.924242	0.0757576
34	0	50	55.5556		26	22	4	8	7	1	24	21	3	0.86	0.14
34	0.1	54	60		25	24	1	6	6	0	29	29	0	0.981481	0.0185185
34	1	50	55.5556		21	21	0	7	7	0	29	29	0	1	0
